# Supplementary material
Source: publisher figshare collection journal article supplement (https://frontiersin.figshare.com/ndownloader/files/32880941)
Supplement: Supplementary file 1 [file 32880941]

# **Supplementary Information for**

## **Controlled growth of indium selenides by high pressure and high temperature method**

Yajie Dai<sup>1</sup>, Shouxin Zhao<sup>2</sup>, Hui Han<sup>1</sup>, Yafei Yan<sup>1</sup>, Wenhui Liu<sup>1</sup>, Hua Zhu<sup>1</sup>, Liang Li<sup>1</sup>,  
Xi Tang<sup>1</sup>, Yang Li<sup>2</sup>, Hui Li<sup>1\*</sup>, Changjin Zhang<sup>1,3</sup>

*<sup>1</sup>Institute of Physical Science and Information Technology and Information Materials and Intelligent Sensing Laboratory of Anhui Province, Anhui University, Hefei 230601, China*

*<sup>2</sup>School of Materials Science and Engineering, Harbin Institute of Technology, Harbin 150001, China*

*<sup>3</sup>High Magnetic Field Laboratory of Anhui Province, Chinese Academy of Sciences, Hefei 230031, China*

\* Correspondence and requests for materials should be addressed to H. L. (email: huili@ahu.edu.cn)

**Table S1.** Controlled growth of indium selenides at different growth conditions with different growth temperature and pressure.

| Precursor<br>In/Se ratio | Pressure<br>(GPa) | Temperature<br>(°C) | Duration<br>(min) | Final products |
|--------------------------|-------------------|---------------------|-------------------|----------------|
| 2.1:3                    | 2.0               | 400 (slow cooling)  | 300               | No crystal     |
| 2.1:3                    | 5.0               | 580 (slow cooling)  | 90                | No crystal     |
| 2.1:3                    | 5.0               | 630 (slow cooling)  | 50                | No crystal     |
| 2.1:3                    | 5.0               | 620 (slow cooling)  | 50                | No crystal     |
| 2.1:3                    | 5.0               | 620 (slow cooling)  | 60                | No crystal     |
| 2.1:3                    | 5.0               | 620 (slow cooling)  | 420               | No crystal     |
| 2.1:3                    | 7.5               | 610 (slow cooling)  | 300               | No crystal     |
| 2.5:3                    | 2.0               | 560 (quench)        | 120               | No crystal     |
| 2.5:3                    | 2.0               | 600 (quench)        | 180               | No crystal     |
| 2.5:3                    | 7.5               | 500 (quench)        | 90                | No crystal     |

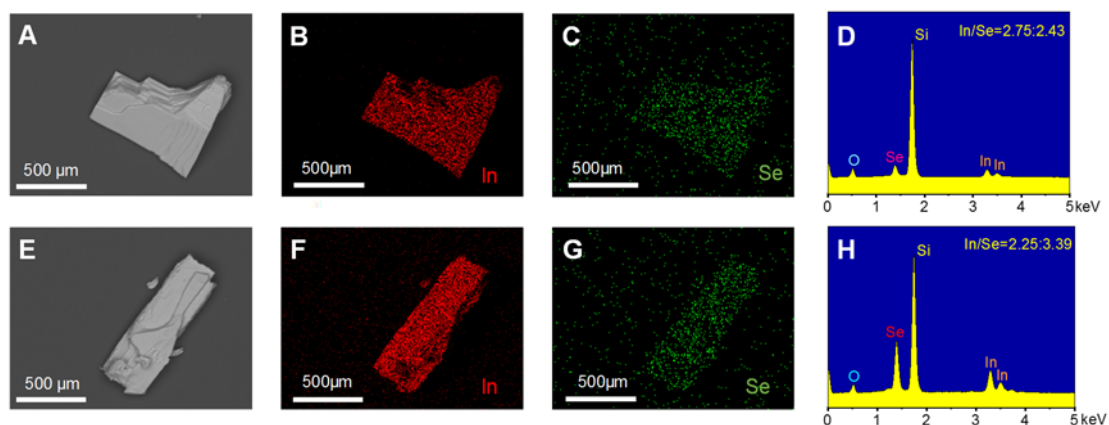

**Figure S1.** The energy dispersive X-ray mapping spectroscopy of indium selenides. (a) SEM image of  $\gamma$ -InSe flake. (b-d) The elemental mapping images scanned on  $\gamma$ -InSe flake in (a). (e) SEM image of  $\alpha$ -In<sub>2</sub>Se<sub>3</sub> flake. (f-h) The elemental mapping images scanned on  $\alpha$ -In<sub>2</sub>Se<sub>3</sub> flake in (e).

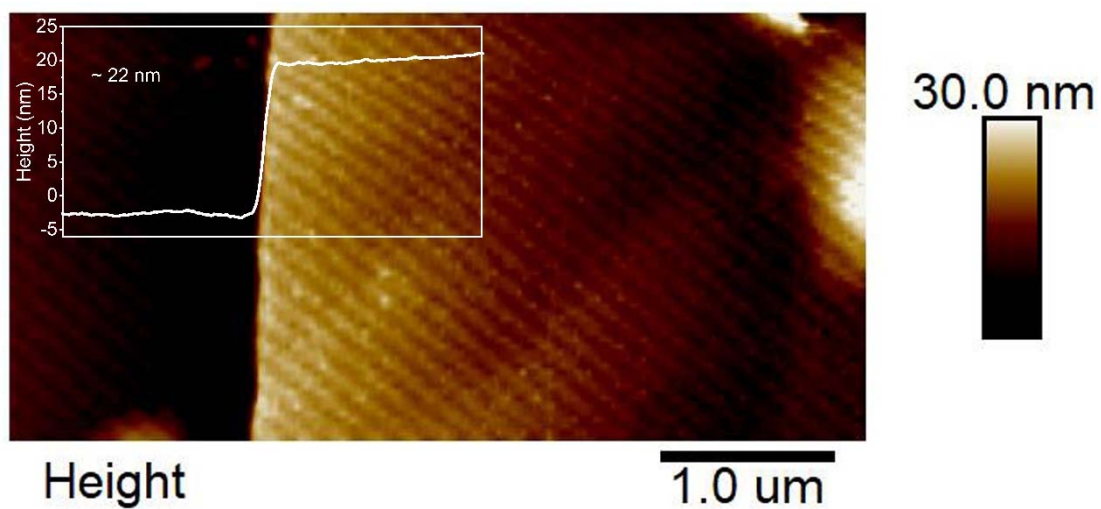

**Figure S2.** AFM measurement of  $\gamma$ -InSe thin flake. The height profile is shown in the inset, indicating the thickness of  $\gamma$ -InSe thin flake is about 22 nm.

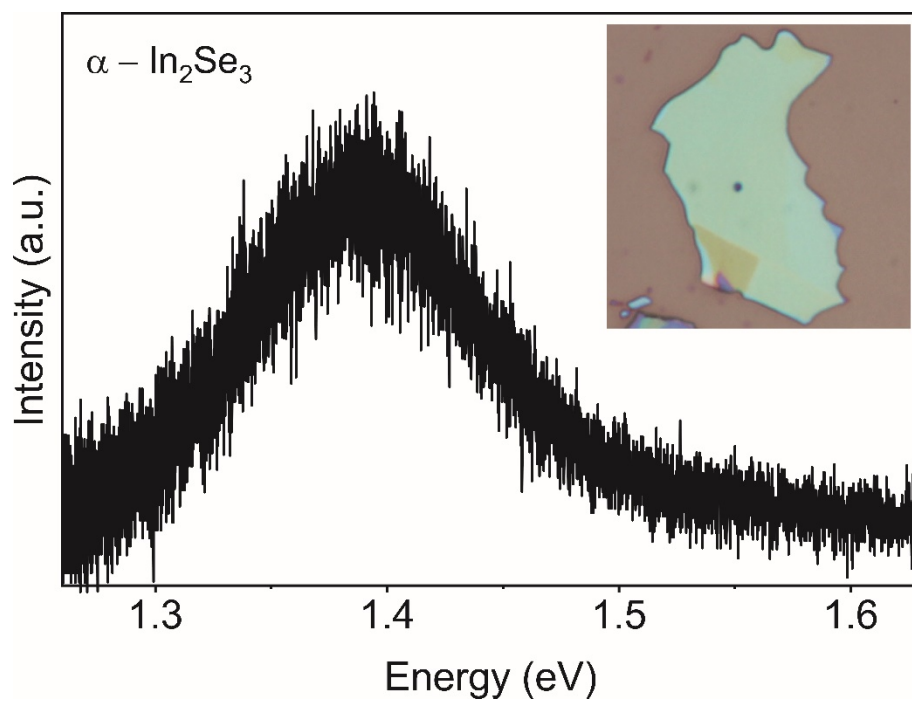

**Figure S3.** Photoluminescence (PL) spectra of exfoliated  $\alpha$ - $\text{In}_2\text{Se}_3$  flake on  $\text{SiO}_2$  substrate. Inset shows the optical image of the  $\alpha$ - $\text{In}_2\text{Se}_3$  flake used for PL measurement.
